# Supplementary material
Source: PubMed Central journal article supplement (PMC7789077)
Supplement: 41415_2020_2504_MOESM1_ESM.pdf [file 41415_2020_2504_MOESM1_ESM.pdf]

## Supplementary data

### ANNEX A: Influence of silicone tubing on particle distribution measurements

#### Materials and Methods

Sodium chloride (>95%) was purchased from Fisher Scientific, Leicestershire, UK. Ultra-pure water (>18.2 M $\Omega$ ) was obtained by ultrafiltration of the municipal supply via a MilliQ Integral 3 (Millipore, MA, USA). Silicone tubing ("Tygon<sup>®</sup>") was purchased from the Cole-Parmer Instrument Co (Illinois, USA) and was reported to have the following dimensions: internal diameter 12.7 mm, outer diameter 17.5 mm, wall thickness 2.4 mm). The tubing was cut into 6 x 2m sections.

The Study was performed in a custom-built chamber (internal dimensions 7.6 m (h) x 4.6 m x 4.6 m; volume  $\sim 160.8 \text{ m}^3$ ) lined with a chemically resistant epoxy resin (Renotex Rollercoat, Renotex Ltd, Wakefield, UK) with a powder-coated, glass-reinforced plastic floor suspended at a height of 1 m from the base of the chamber. The chamber environment was maintained at constant temperature and humidity ( $21 \pm 1^\circ \text{C}$ ,  $40 \pm 2\% \text{RH}$ ) through an internally mounted air conditioning unit (iQool12, Aircon Direct, UK). Air was removed from the chamber via a stainless steel central duct ( $\phi = 150 \text{ mm}$ ; wind velocity at orifice  $\sim 3.15 \text{ m s}^{-1}$ ) below the suspended floor and was recirculated via five, overhead polypropylene ducts ( $\phi = 110 \text{ mm}$ ; velocity  $\sim 1.6 \text{ ms}^{-1}$  at each duct orifice) suspended 0.2 m below the chamber ceiling. The recirculation rate was controlled by an in-line, variable speed pump (Model DV150, P&G Fabrications, Essex, UK). Air within the chamber was agitated using a metal-bladed electric fan (model W4E400-DS02-38, RS Components, UK) which produced a constant air speed of  $\sim 1.5 \text{ m s}^{-1}$  at a distance of 1.5 m. Entry to the exposure chamber was via an air-lock, operating at an over pressure of  $\sim 5 \text{ mBar}$ .

The aerosol was produced using a spray gun (DeVilbliss Cobra 1 automatic spray gun, Hitech Spray Ltd, UK) fitted with fluid nozzle and separator (SP-200S-12-K, Devilbliss) and air cap (SP-100-522-COM-K, Devilbliss), with a 2.27 L pressure kettle (DeVilbliss KBII, Hitech Spray Ltd, UK; operating pressure 2.5 PSI) containing 20% (w/w) aqueous sodium chloride. Compressed air (90 PSI) was supplied from a compressor (ABAC Aria Compressa S.p.A., Model B 2800B, Robassomero, Italy). The output from the spray gun was directed through an impactor (comprising 1.2 m length of 10 mm diameter steel ducting bent through  $180^\circ$ ) to remove large ( $>10 \mu\text{m}$ ) particles. A small ( $\phi = 8 \text{ mm}$ ) vent was placed at the base of the impactor to drain excess fluid ( $\sim 20\%$  of the initial injection volume). Aerosol was generated within the chamber until the total particle concentration was  $2.11 \pm 0.16 \times 10^6 \text{ cm}^{-3}$ . The particle concentration and corresponding aerosol size distribution was measured using a high-resolution particle sizer (ELPI+, Dekati, Kangasala, Finland) at a sample acquisition rate of 1 Hz.

The study started with a 30 s baseline aerosol measurement by the particle sizer, after which the first silicone tube was attached to the particle sizer for a further 30 s period. The tube was then disconnected for 30 seconds and the process repeated three times before the tubing



*Figure S2: Position of silicone tube relative to the particle sizer.*

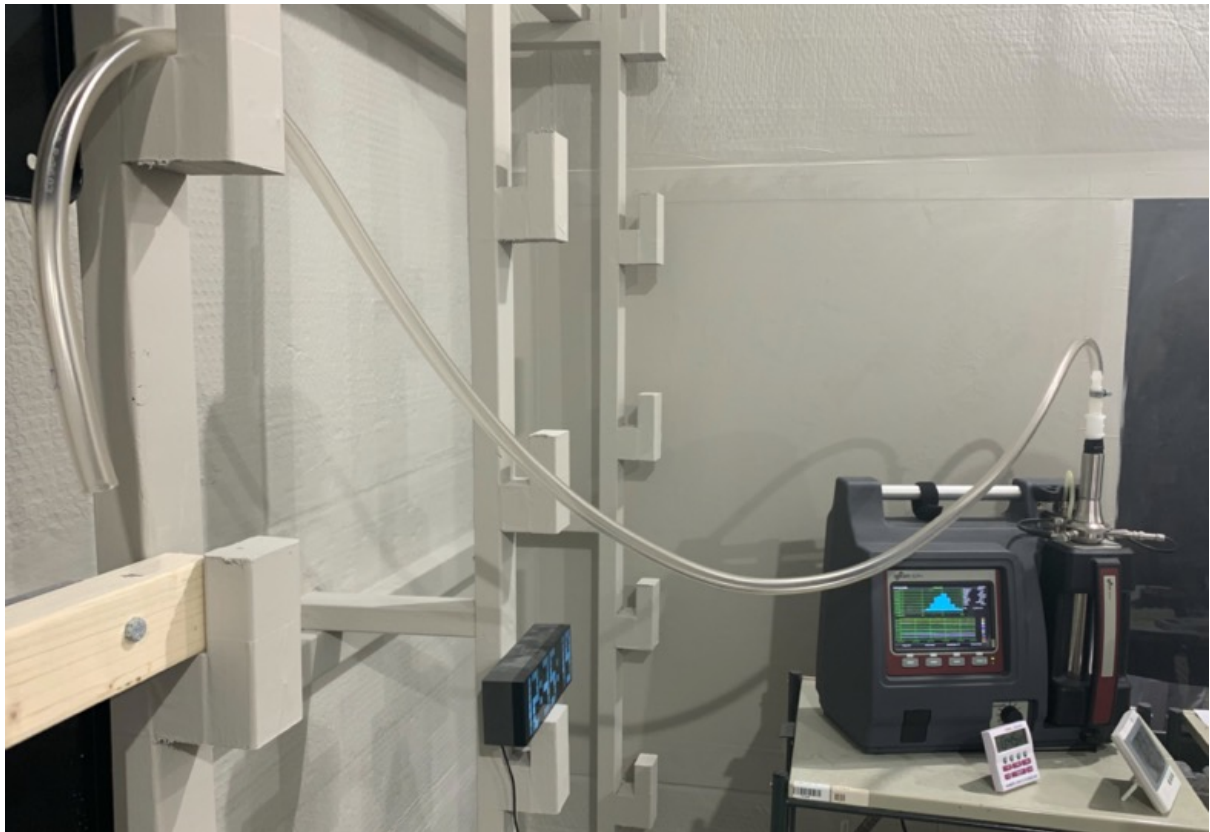

## **Results**

Triplicate cycles of connecting and disconnecting each tube had no observable effect on the measured particle size distribution (Figure S3).

Figure S3: Particle size distribution of salt aerosol measured in the presence (“on”) or absence (“off”) of tubes 1 – 6. Each tube was connected/disconnected in three cycles (1-3).

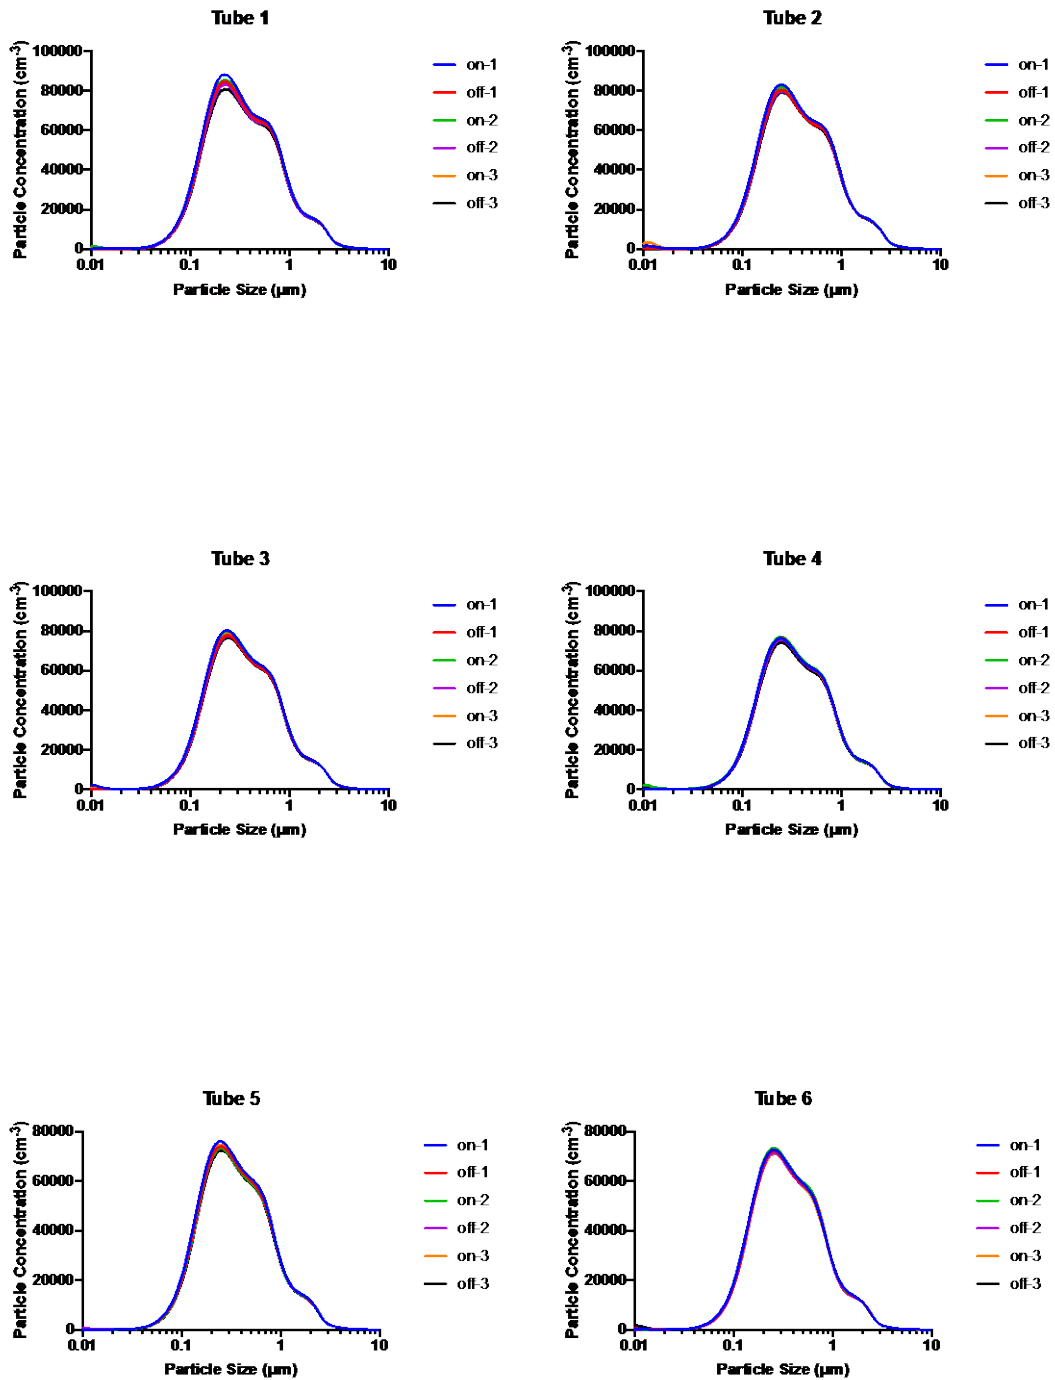

## ANNEX B: Particle distribution histograms

Figure S4: Particle size distributions measured at Location 3 under intervention group A (Control) during procedures I to VI and at the end of the Decay period.

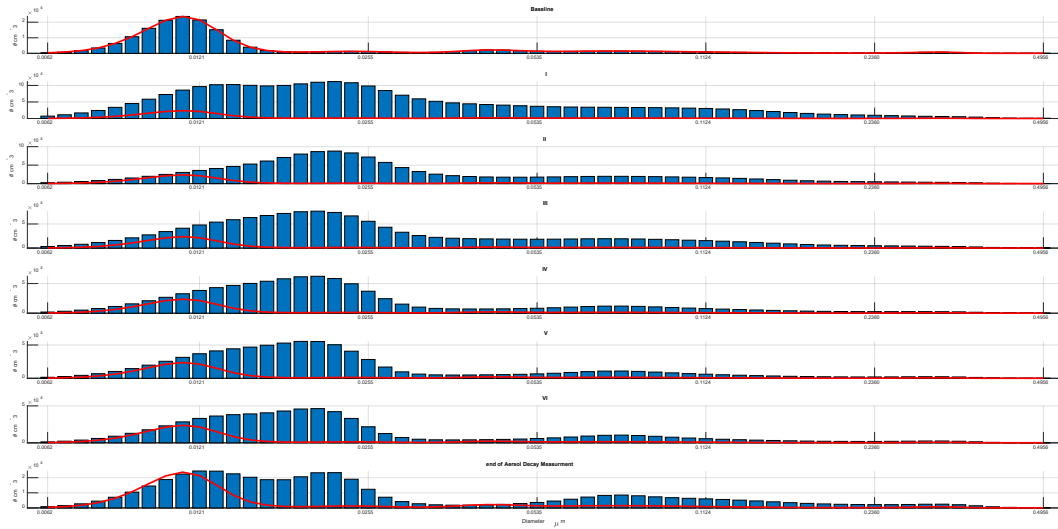

Figure S5: Particle size distributions measured at Location 3 under intervention group E (HVS(IO) + HVS (EO) + ACS) during procedures I to VI and at the end of the Decay period.

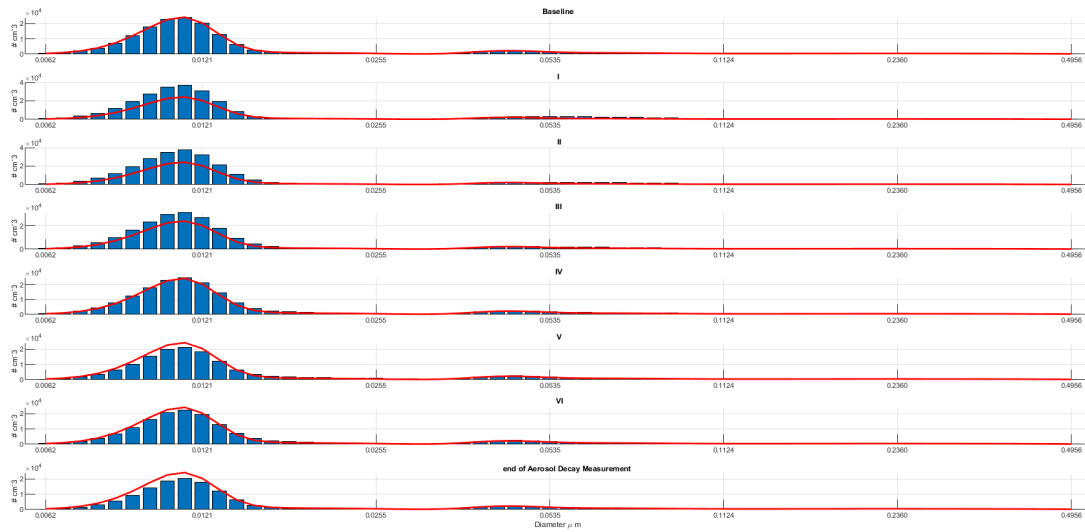

## ANNEX C: Micro and macro environments

Figure S6: Diagram presenting the aerosol dispersion zones in a dental clinic. Red and yellow zones show the micro-environment with the highest aerosol concentration. The blue shading represents the interface between micro and macro environment, where lower aerosol concentrations were measured (Refer to Table S1 for sampling positions).

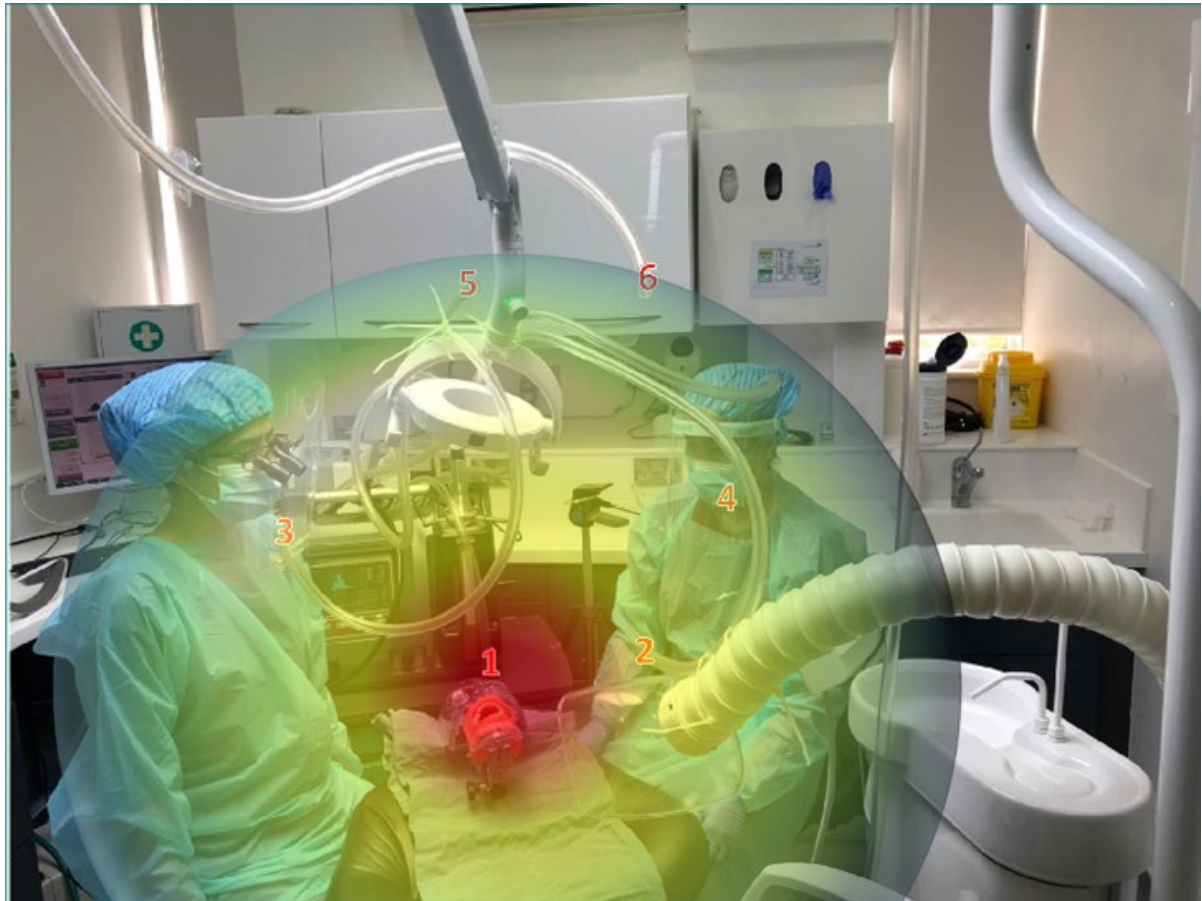

## ANNEX D: Supplementary Figures

Figure S7: Total particle concentration generated during AGPs in the presence of HVS(10) (intervention group B; Table S2) at each air sampling location (1 – 6; Table S1). Acquisition of air samples were performed during the baseline period (0 – 3 min), during the six procedures (3 – 21 min) and following cessation of procedures (21 – 36 min). Dotted lines indicate the upper and lower boundaries of the baseline data. Each data point represents the sum of particles measured by HR-ELPI over 1 second during each replicate (n=3).

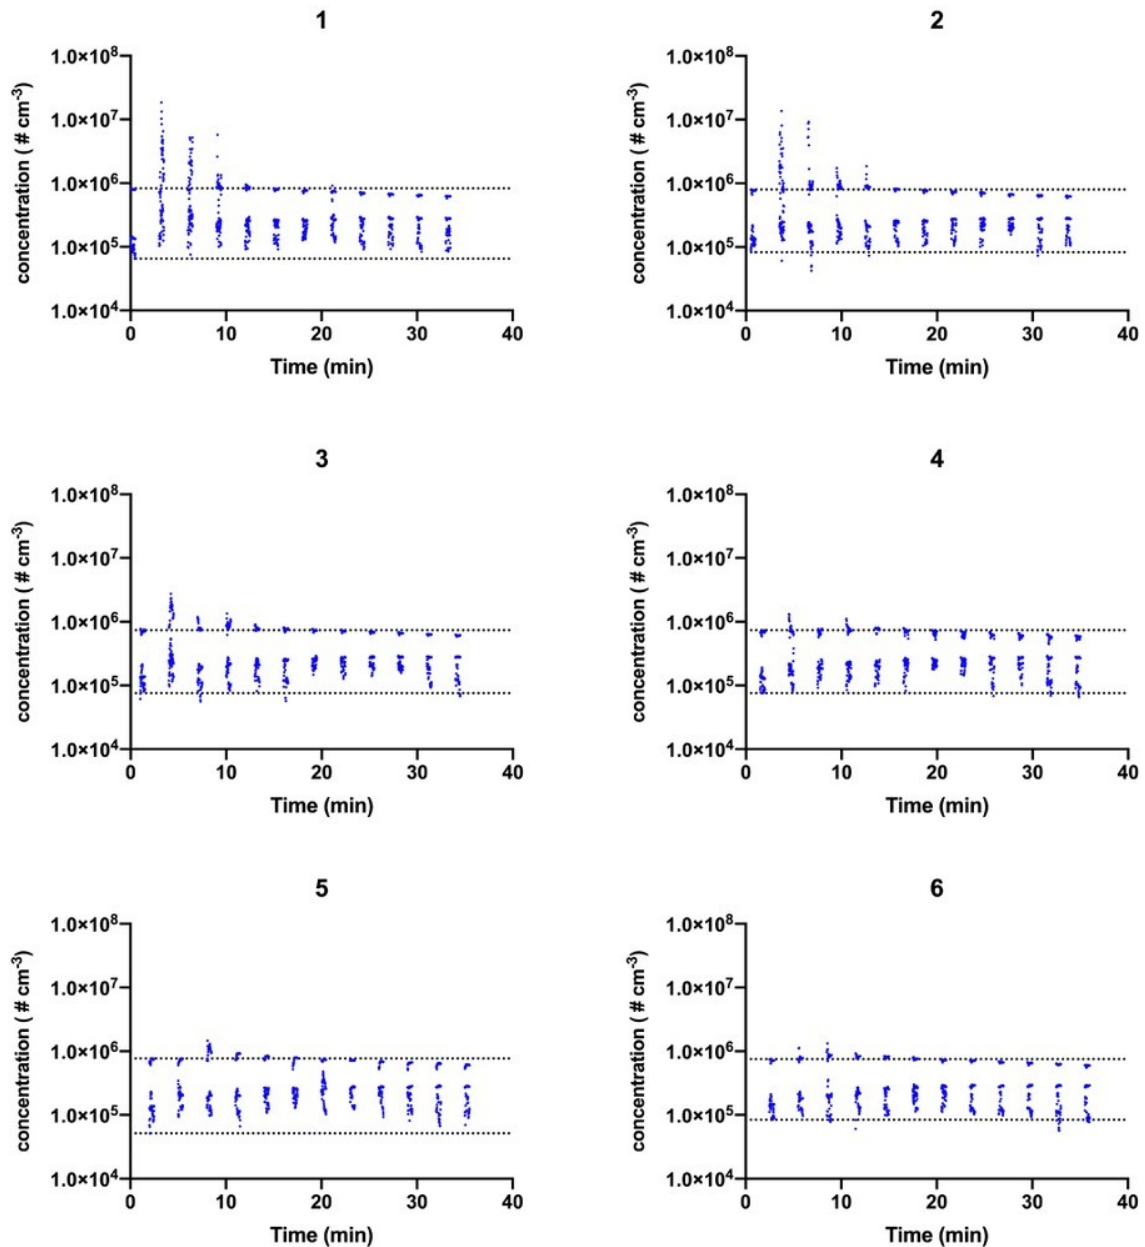

Figure S8: Total particle concentration generated during AGPs in the presence of HVS(IO) and ACS (intervention group C; Table S2) at each air sampling location (1 – 6; Table S1). Acquisition of air samples were performed during the baseline period (0 – 3 min), during the six procedures (3 – 21 min) and following cessation of procedures (21 – 36 min). Dotted lines indicate the upper and lower boundaries of the baseline data. Each data point represents the sum of particles measured by HR-ELPI over 1 second during each replicate (n=3).

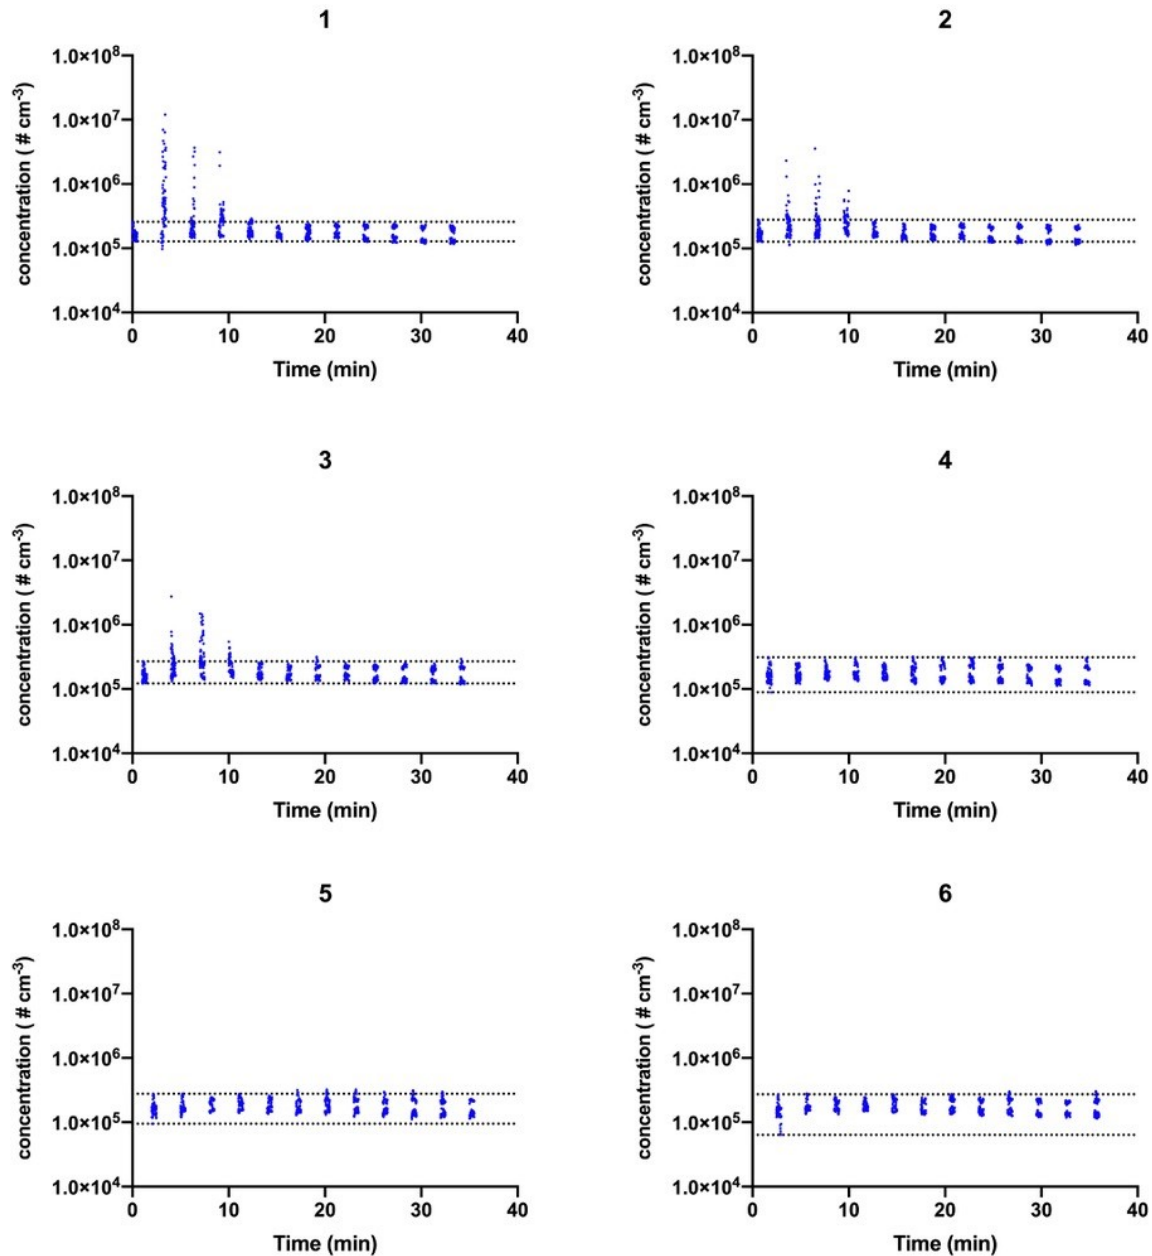



Figure S9: Total particle concentration generated during AGPs in the presence of HVS(IO) and HVS(EO) (intervention group D; Table S2) at each air sampling location (1 – 6; Table S1). Acquisition of air samples were performed during the baseline period (0 – 3 min), during the six procedures (3 – 21 min) and following cessation of procedures (21 – 36 min). Dotted lines indicate the upper and lower boundaries of the baseline data. Each data point represents the sum of particles measured by HR-ELPI over 1 second during each replicate (n=3).

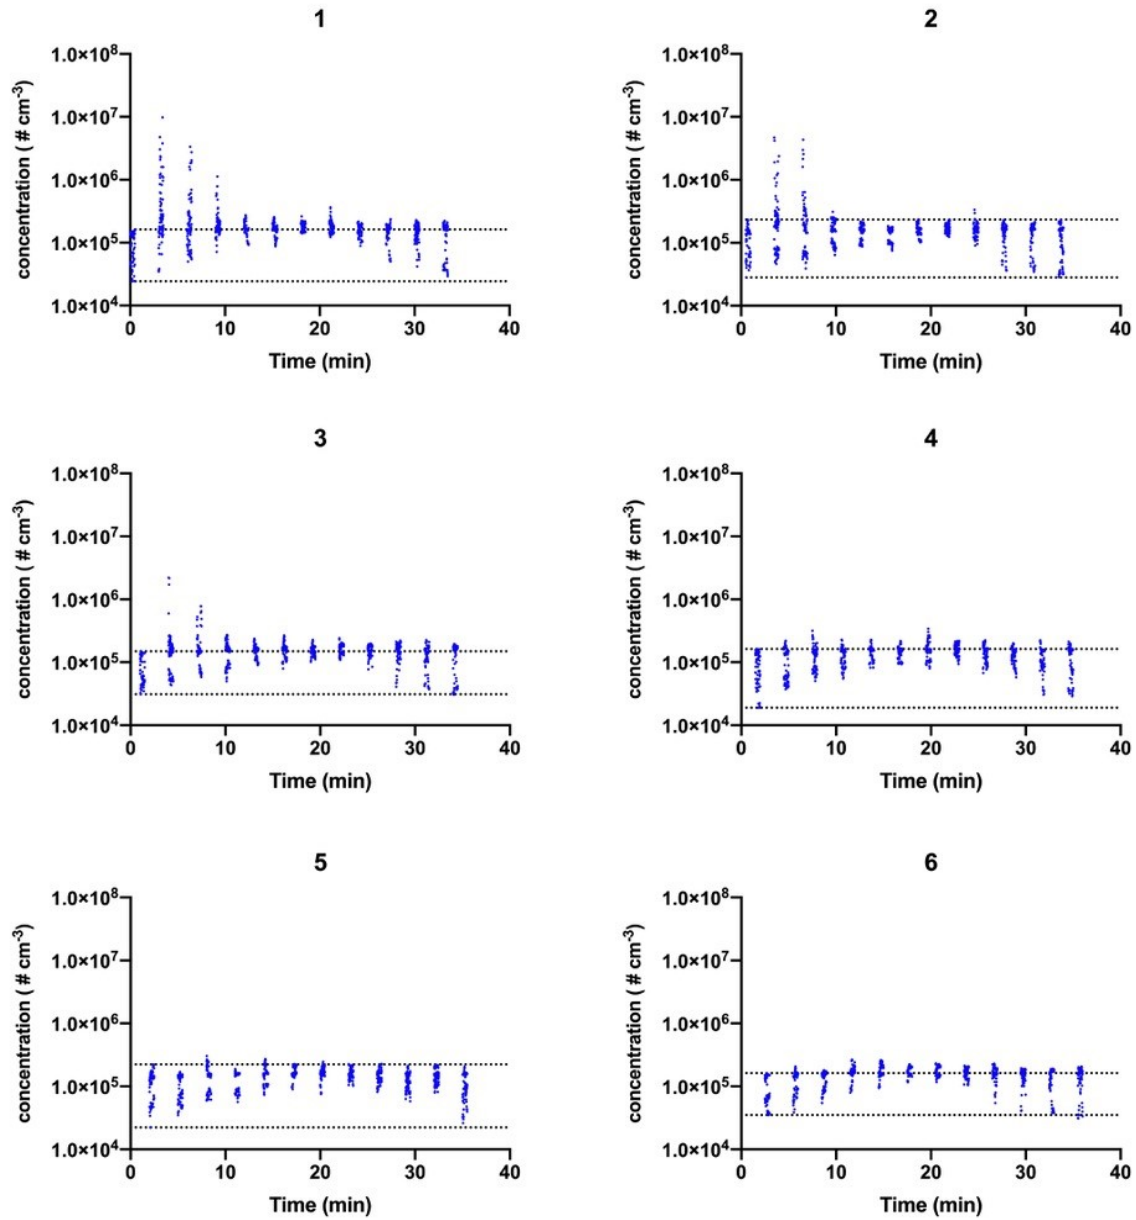

Figure S10: Linear regression (with 95% confidence intervals) of decay-phase particle concentration data. Each data point represents the median sum particle concentration measured by HR-ELPI per second during each replicate (n=3). Dotted line indicates baseline particle range.

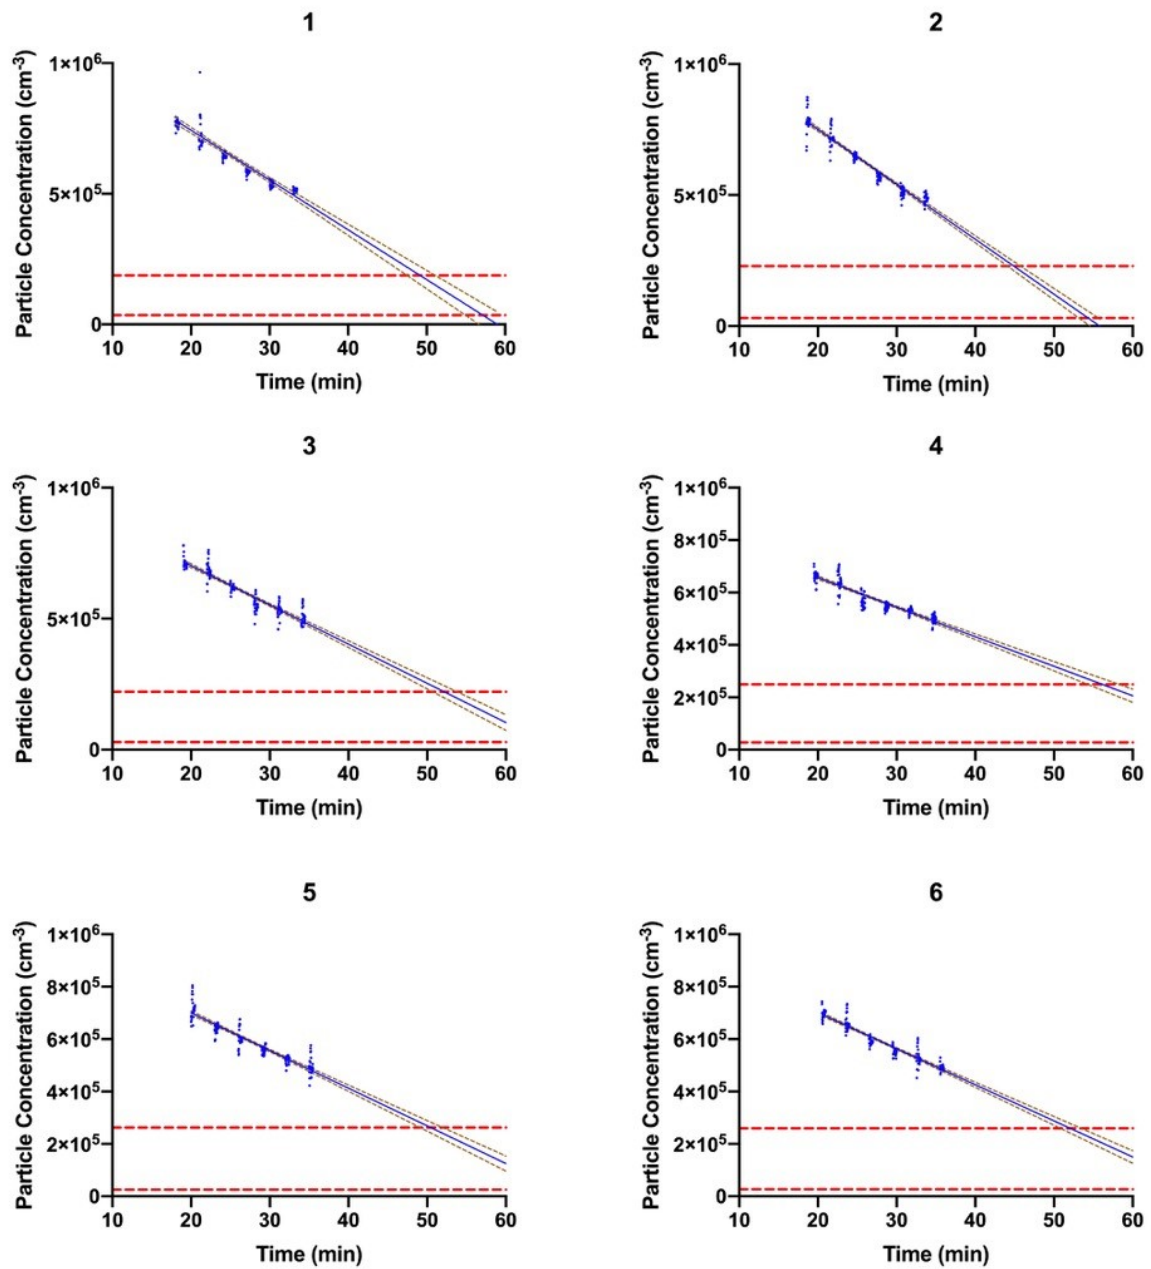

| Regression parameter | Location |          |          |          |          |          |
|----------------------|----------|----------|----------|----------|----------|----------|
|                      | 1        | 2        | 3        | 4        | 5        | 6        |
| Y-Intercept          | 1.1E+06  | 1.2E+06  | 1.0E+06  | 8.8E+05  | 9.9E+05  | 9.8E+05  |
| Slope                | -1.9E+04 | -2.1E+04 | -1.5E+04 | -1.1E+04 | -1.4E+04 | -1.4E+04 |
| r <sup>2</sup>       | 0.7967   | 0.9218   | 0.8609   | 0.8273   | 0.8533   | 0.8827   |

## D: Supplementary Tables

**Table S1:** Air sampling location coordinates, expressed relative to the phantom head (nominal coordinates  $x=0, y=0, z=0$ ).

| Sample Location No. | Name                         | Co-ordinates relative to phantom head (mm) |      |      | Linear Distance from source (mm) |
|---------------------|------------------------------|--------------------------------------------|------|------|----------------------------------|
|                     |                              | x                                          | y    | z    |                                  |
| 1                   | Phantom head (source(mouth)) | 0                                          | 80   | 0    | 80                               |
| 2                   | HVS (EO) in-take             | 135                                        | -110 | 100  | 200                              |
| 3                   | Dentist                      | -262                                       | 145  | 265  | 400                              |
| 4                   | Assistant                    | 354                                        | 160  | 300  | 500                              |
| 5                   | Wall                         | 0                                          | 900  | 1045 | 1480                             |
| 6                   | Ceiling Light                | 726                                        | -383 | 1495 | 1700                             |

**Table S2:** Summary of aerosol removal interventions used in each experiment. Note that intra-oral low volume suction (LVS) was used in all treatment groups (including control) to represent standard practice and to prevent excess fluid accumulation within the phantom head.

|                           | Interventions             |                                                                         |                                              |                             |
|---------------------------|---------------------------|-------------------------------------------------------------------------|----------------------------------------------|-----------------------------|
|                           | LVS<br>Low volume suction | HVS(IO)<br>High Volume Suction (Intra-oral) with air filtration system. | HVS(EO)<br>High Volume Suction (extra-oral). | ACS<br>Air Cleaning System. |
| <b>Intervention group</b> |                           |                                                                         |                                              |                             |
| <b>A</b>                  | X                         |                                                                         |                                              |                             |
| <b>B</b>                  | X                         | X                                                                       |                                              |                             |
| <b>C</b>                  | X                         | X                                                                       |                                              | X                           |
| <b>D</b>                  | X                         | X                                                                       | X                                            |                             |
| <b>E</b>                  | X                         | X                                                                       | X                                            | X                           |

**Table S3:** Procedural equipment and corresponding coolant flow rates.

| Procedure | Description                                                          | Handpieces RPM | Ultrasonic Scalers (kHz) | Coolant Flow Rate (mL min <sup>-1</sup> ) |
|-----------|----------------------------------------------------------------------|----------------|--------------------------|-------------------------------------------|
| I         | W&H Synea Vision TK94 hand-piece (Air Turbine) with long tapered bur | 400,000        |                          | 55                                        |
| II        | NSK Ti Max Z95L hand piece (Electric) with long tapered bur          | 200,000        |                          | 67                                        |
| III       | Sirona T1 Control hand-piece (Air turbine) with long tapered bur     | 420,000        |                          | 56                                        |
| IV        | 3 in1 syringe from Belmont Cleo II chair                             |                |                          | 82                                        |
| V         | Cavitron Jet Plus Ultrasonic with 30K FSI-SLI tip                    |                | 30                       | 25                                        |
| VI        | NSK Vario Lux 2 (Piezo) with G8 tip                                  |                | 32                       | 78                                        |

**Table S4:** Detail of preparations.

| Procedure | Teeth                                                                     | Detail                                                                                                                                                |
|-----------|---------------------------------------------------------------------------|-------------------------------------------------------------------------------------------------------------------------------------------------------|
| I         | Air turbine handpiece - upper left quadrant (teeth 18 – 14)               | Occlusal cavity preparations were performed for each tooth.                                                                                           |
| II        | Electric contra-angle handpiece - upper anterior quadrant (teeth 13 – 23) | Buccal class V cavities were prepared in the cervical region for each tooth.                                                                          |
| III       | Air turbine handpiece - upper right quadrant (teeth 24 – 28)              | Occlusal cavity preparations were performed for each tooth.                                                                                           |
| IV        | Three in one syringe - lower left quadrant (teeth 38 – 34)                | The syringe was moved around gently, in an elliptical fashion over the quadrant in an occlusal orientation.                                           |
| V         | Ultrasonic scaler - lower anterior quadrant (teeth 33 – 43)               | Ultrasonic procedures were performed at the labiogingival margin interface for anterior teeth and buccogingival margin interface for posterior teeth. |
| VI        | Ultrasonic scaler - lower right quadrant (teeth 44 – 48)                  |                                                                                                                                                       |
